# Supplementary material
Source: MDPI journal article supplement (https://www.mdpi.com/2673-7272/4/1/6)
Supplement: s1 [file s1]

# Supplementary Materials

As far as you know, are you registered as severely sight impaired or sight impaired?

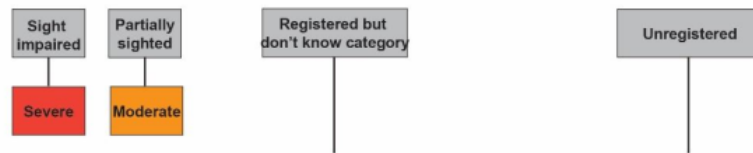

Do you generally have any difficulty seeing ordinary newsprint at arm's length / the face of someone across a room – that is from 4 metres or 12 feet away / people or things in the periphery of your vision?

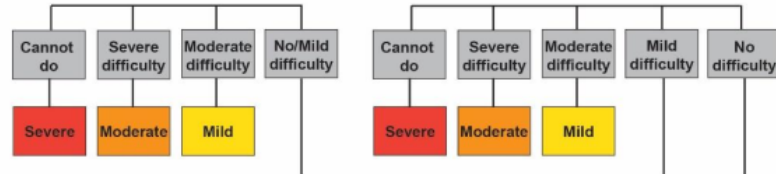

Does your vision impairment legally prevent you from driving? It does not matter whether you have passed your test, we just want to know whether you are legally able to drive?

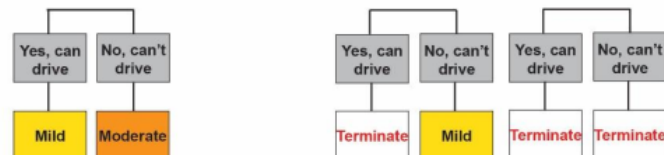

Figure S1. Flowchart of process for categorising V.I. severity.
